# Supplementary material
Source: PubMed Central journal article supplement (PMC7048194)

# Supplementary Figure 1: Uncropped scans with molecular weight indications

Fig. 2c,f: Same membranes are indicated by a black dashed box, and the cropped area is indicated by a red box. Membrane was cut (indicated by a blue, dashed line), and the membranes were co-incubated with goat-anti-mouse IgG-Alexa Fluor 680 and goat-anti-rabbit IgG-IRDye 800CW secondary antibodies.

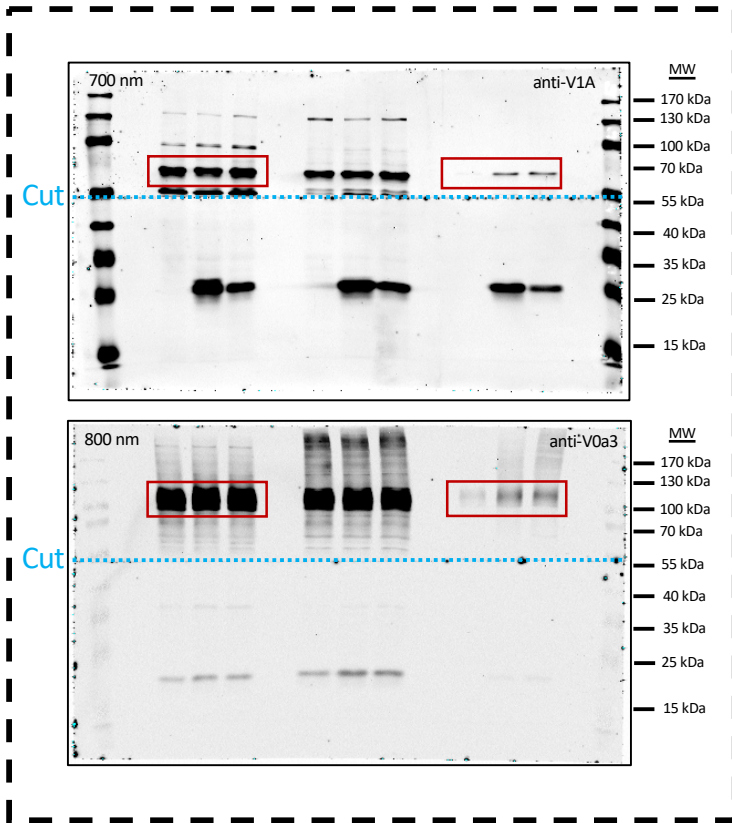

Fig. 3b: The cropped area is indicated by a red box. The membrane was cut (indicated by a blue, dashed line) and incubated with goat-anti-mouse IgG-Alexa Fluor 680 secondary antibody.

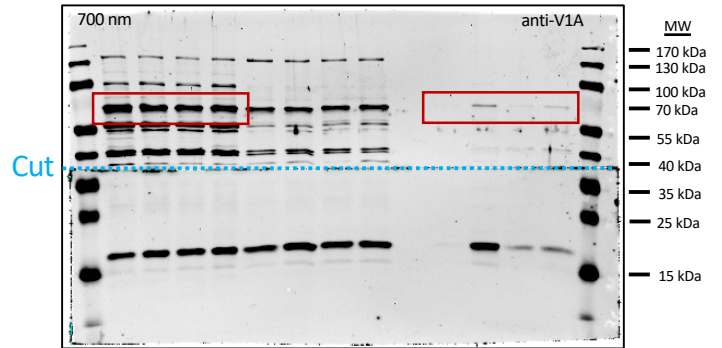

Fig. 4c: Same membranes are indicated by a black dashed box, and the cropped area is indicated by a red box. Membrane was cut (indicated by a blue, dashed line), and the membranes were incubated with goat-anti-mouse IgG-Alexa Fluor 680 or goat-anti-rabbit IgG-IRDye 800CW secondary antibodies.

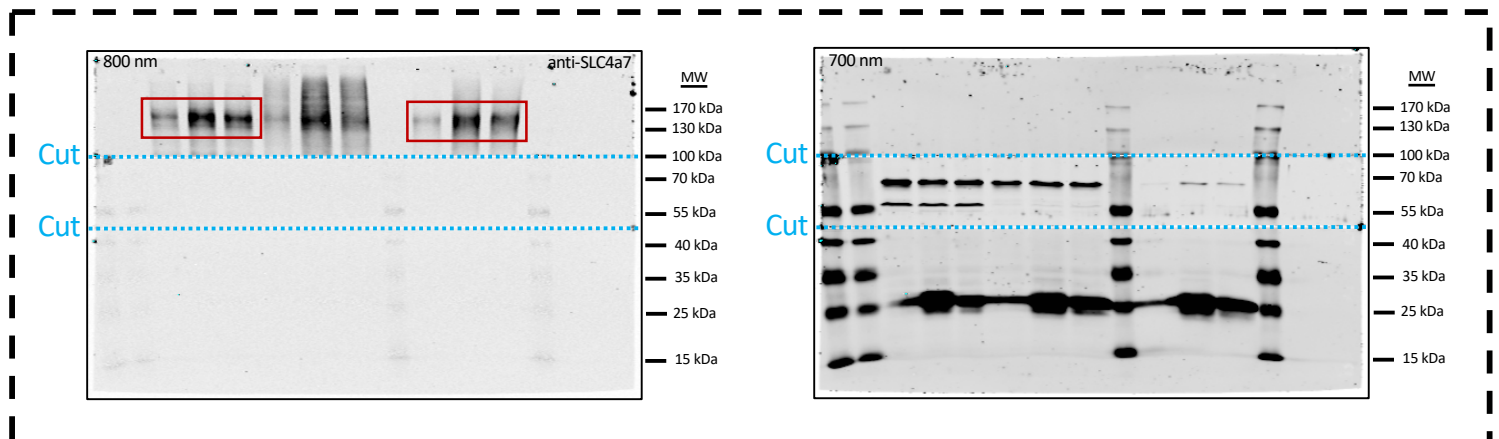

Fig. 4d: Same membranes are indicated by a black dashed box, and the cropped area is indicated by a red box. Membranes were cut (indicated by a blue, dashed line), and the membranes were incubated with goat-anti-mouse IgG-Alexa Fluor 680 or goat-anti-rabbit IgG-IRDye 800CW secondary antibodies.

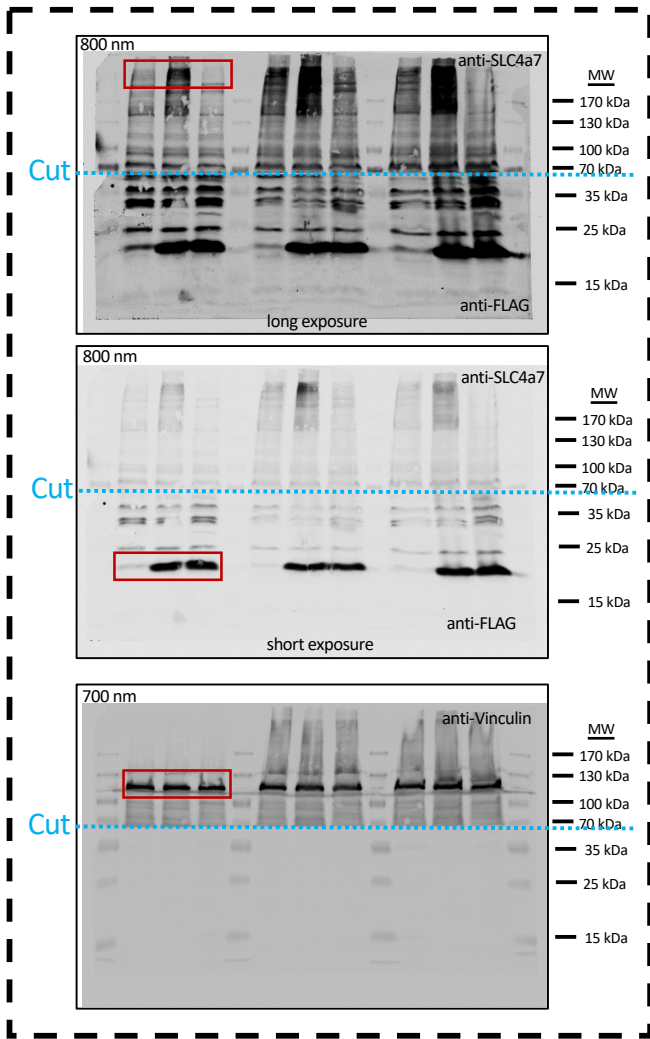

Fig. 4f: Same membranes are indicated by a black dashed box, and the cropped area is indicated by a red box. Membranes were cut (indicated by a blue, dashed line), and the membranes were incubated with goat-anti-mouse IgG-Alexa Fluor 680 or goat-anti-rabbit IgG-IRDye 800CW secondary antibodies.

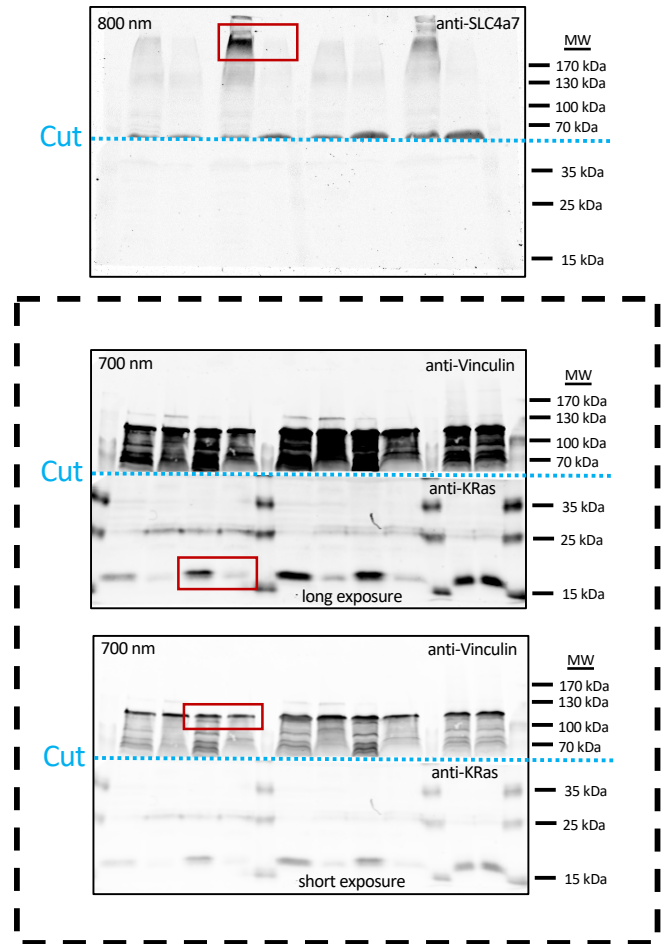

Extended Data Fig. 1c: Same membranes are indicated by a black dashed box, and the cropped area is indicated by a red box. The membrane was cut (indicated by a blue, dashed line) and incubated with goat-anti-mouse IgG-Alexa Fluor 680 secondary antibody.

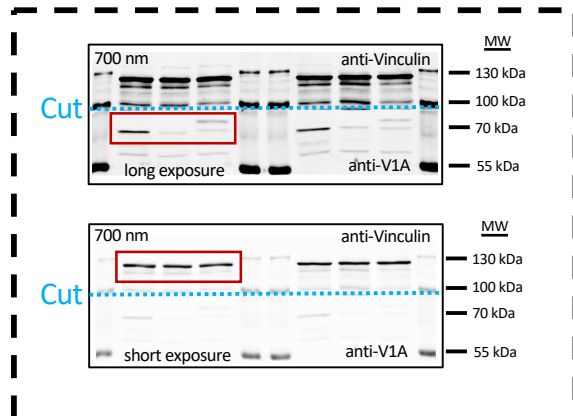

Extended Data Fig. 1g: Same membranes are indicated by a black dashed box, and the cropped area is indicated by a red box. The membrane was cut (indicated by a blue, dashed line) and incubated with goat-anti-mouse IgG-Alexa Fluor 680 secondary antibody.

### HeLa Blot

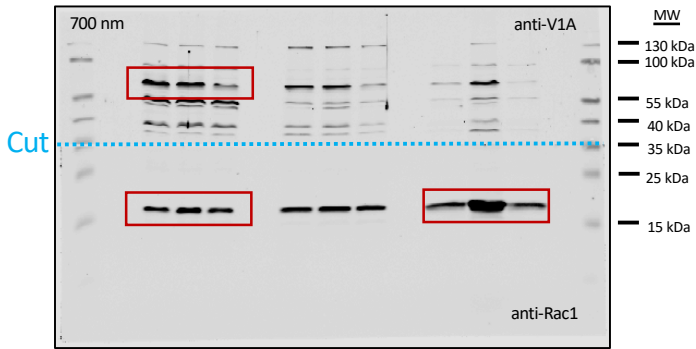

### Panc1 Blot

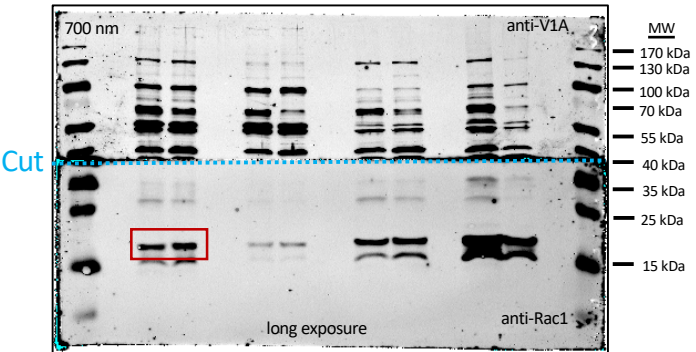

### Panc1 Blot

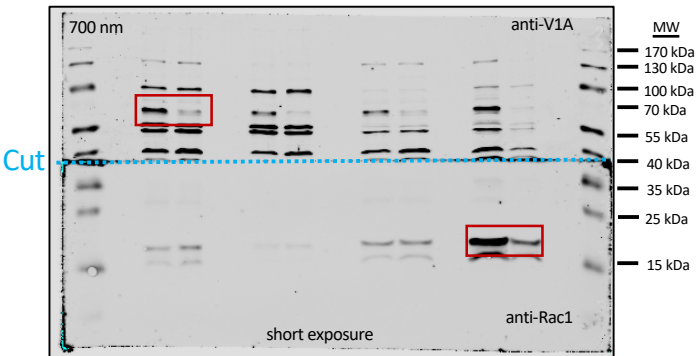

### DLD1 Blot

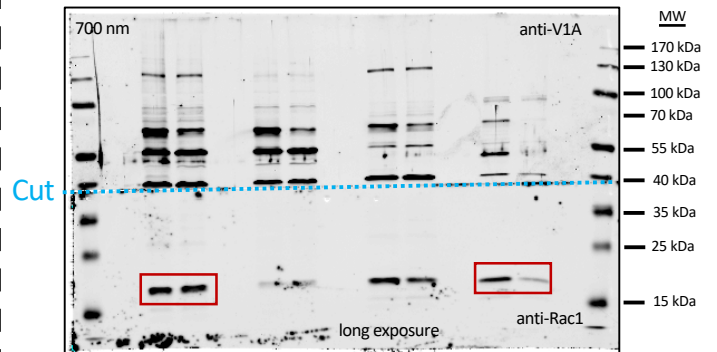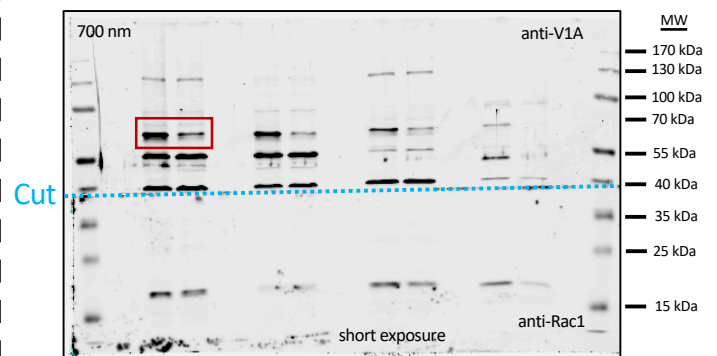

Extended Data Fig. 2a: Same membranes are indicated by a black dashed box, and the cropped area is indicated by a red box. Membrane was cut (indicated by a blue, dashed line), and the membranes were incubated with goat-anti-mouse IgG-Alexa Fluor 680 or goat-anti-rabbit IgG-IRDye 800CW secondary antibodies.

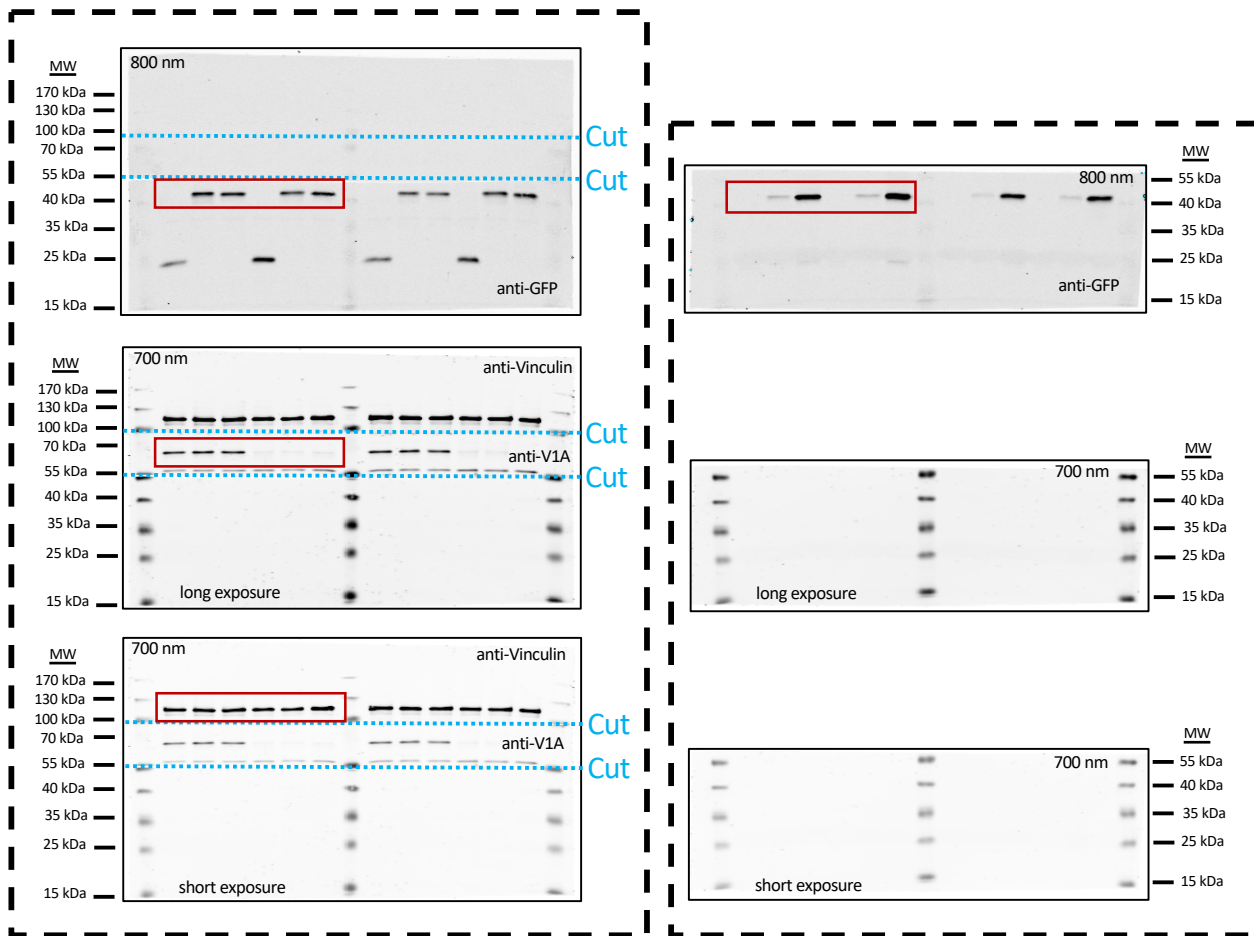

Extended Data Fig. 2b: Same membranes are indicated by a black dashed box, and the cropped area is indicated by a red box. The membrane was cut (indicated by a blue, dashed line) and incubated with goat-anti-mouse IgG-Alexa Fluor 680 secondary antibody.

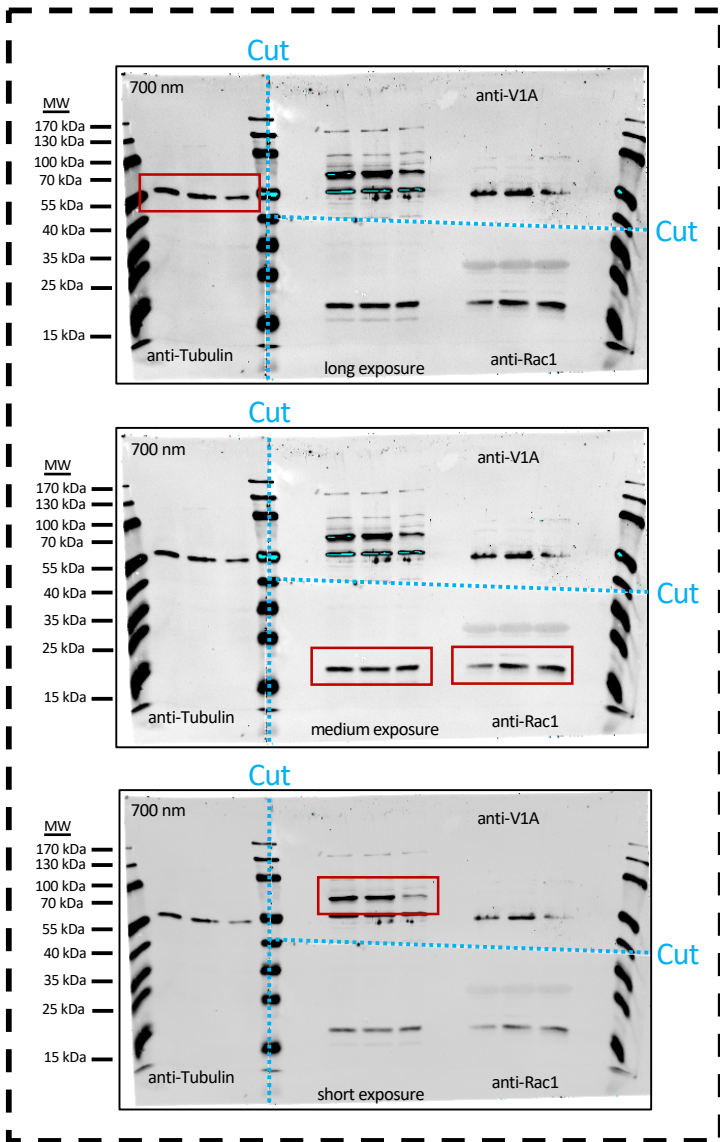

Extended Data Fig. 5c: The cropped area is indicated by a red box. The membrane was cut (indicated by a blue, dashed line) and incubated with goat-anti-mouse IgG-Alexa Fluor 680 secondary antibody.

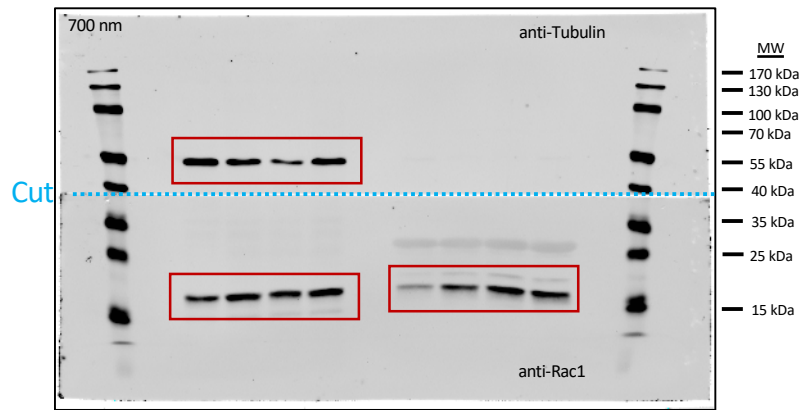

Extended Data Fig. 5d: The cropped area is indicated by a red box. The membrane was cut (indicated by a blue, dashed line) and incubated with goat-anti-mouse IgG-Alexa Fluor 680 secondary antibody.

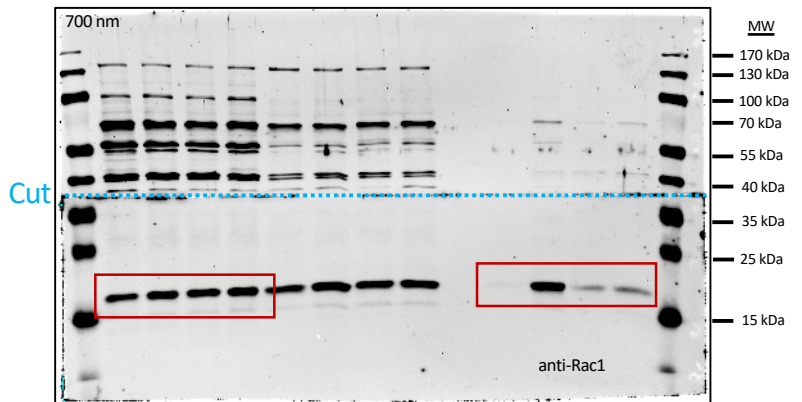

Extended Data Fig. 7j: Same membranes are indicated by a black, dashed box, and the cropped area is indicated by a red box. Membranes were cut (indicated by a blue, dashed line), and the membranes were incubated with goat-anti-mouse IgG-Alexa Fluor 680 and or goat-anti-rabbit IgG-IRDye 800CW secondary antibodies.

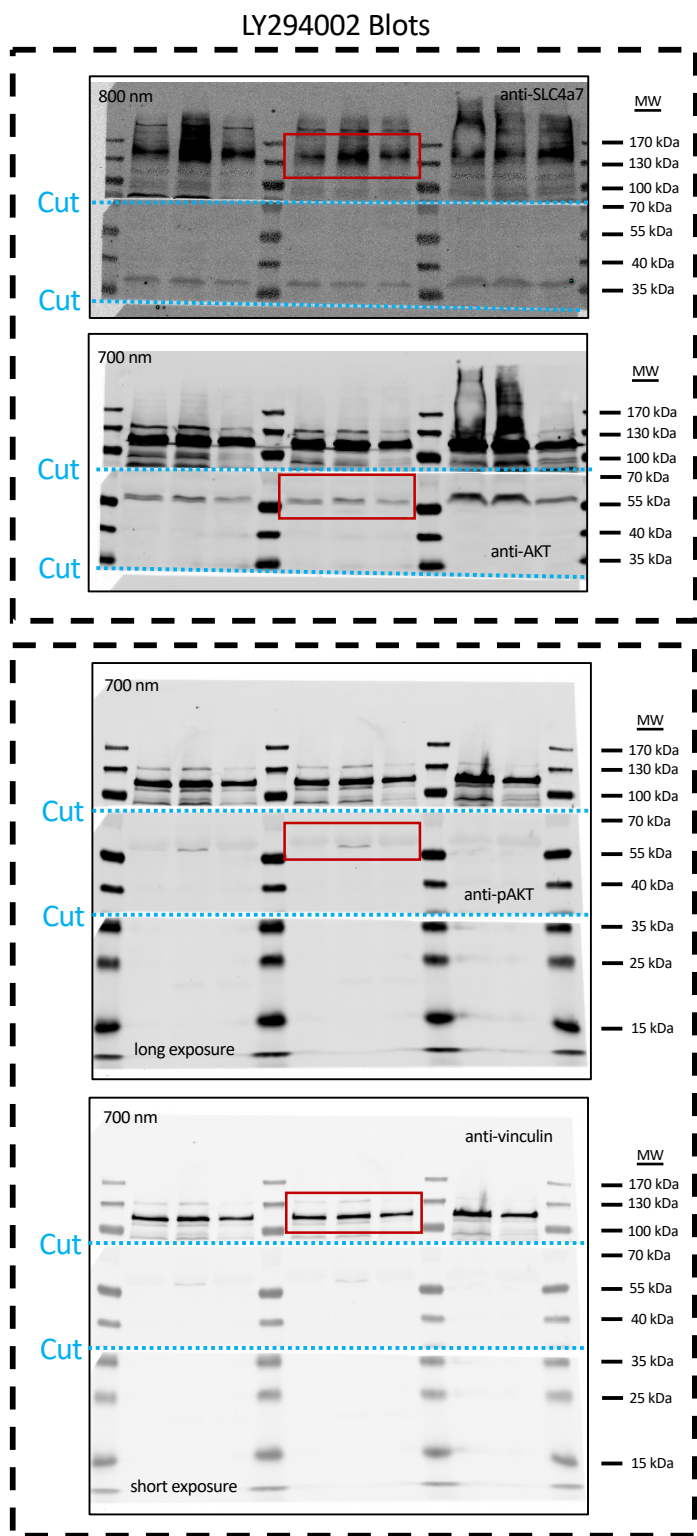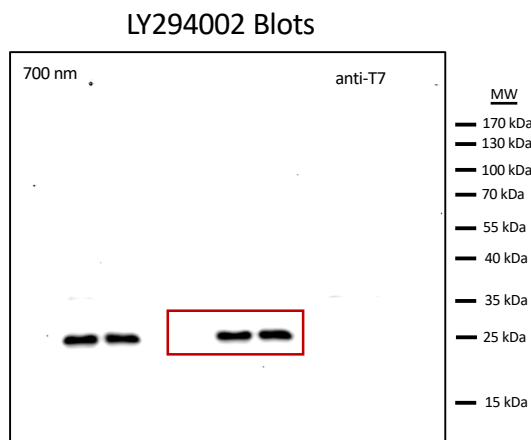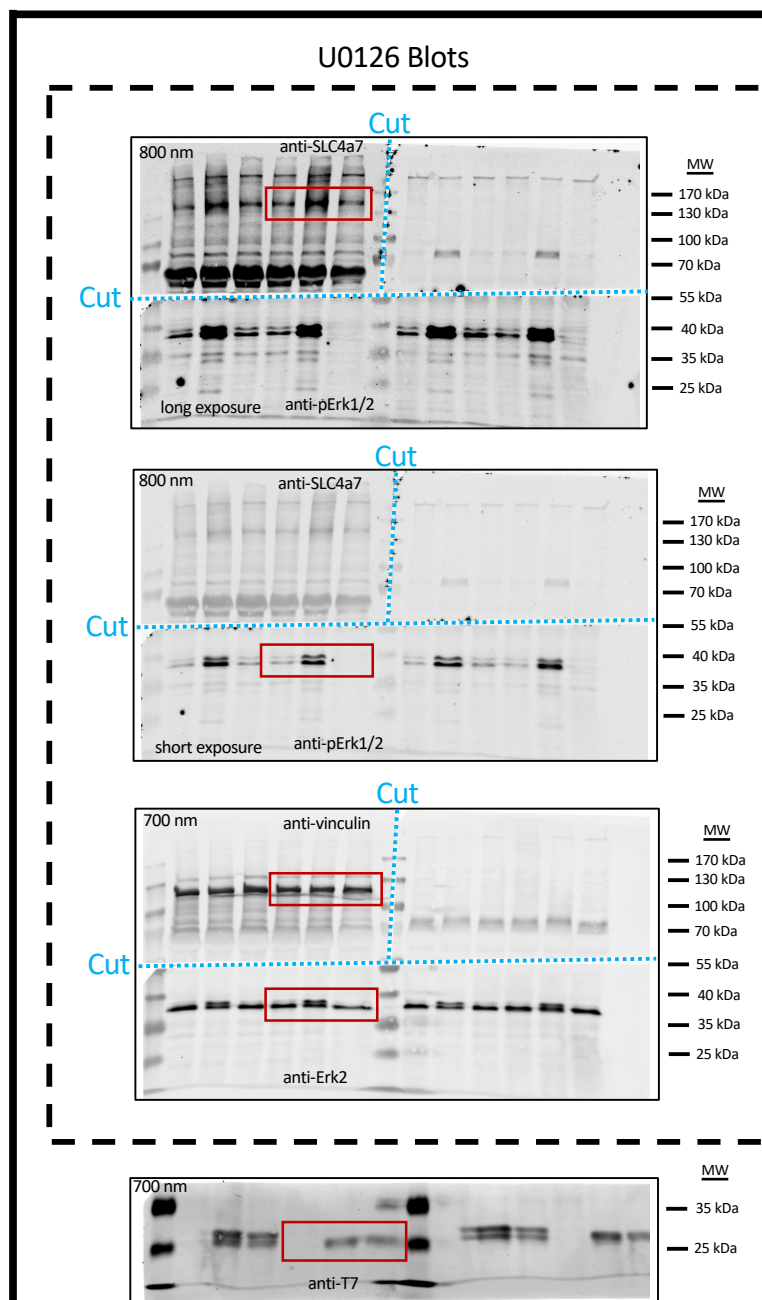

Extended Data Fig. 7l: Same membranes are indicated by a black dashed box, and the cropped area is indicated by a red box. The membranes were co-incubated with goat-anti-mouse IgG-Alexa Fluor 680 and goat-anti-rabbit IgG-IRDye 800CW secondary antibodies.

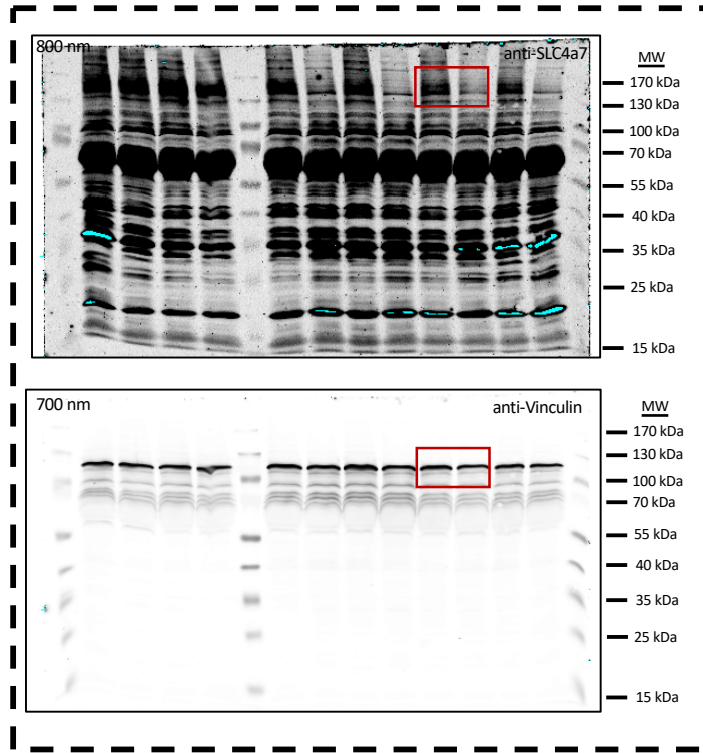

Extended Data Fig. 7m: Same membranes are indicated by a black dashed box, and the cropped area is indicated by a red box. Membrane was cut (indicated by a blue, dashed line), and the membranes were co-incubated with goat-anti-mouse IgG-Alexa Fluor 680 and goat-anti-rabbit IgG-IRDye 800CW secondary antibodies.

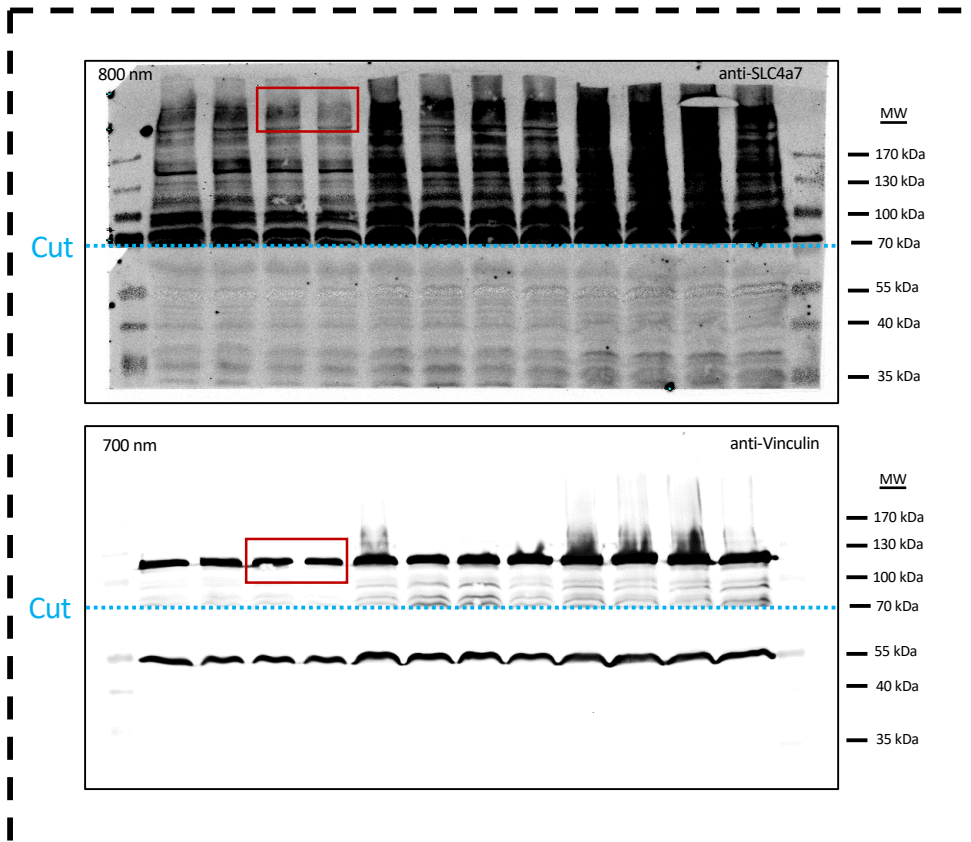

Supplement: NIHMS1541434-supplement-1.pdf [file NIHMS1541434-supplement-1.pdf]
